# Supplementary material
Source: PubMed Central journal article supplement (PMC2754678)
Supplement: en.2009-0236_2.pdf [file en.2009-0236_2.pdf]

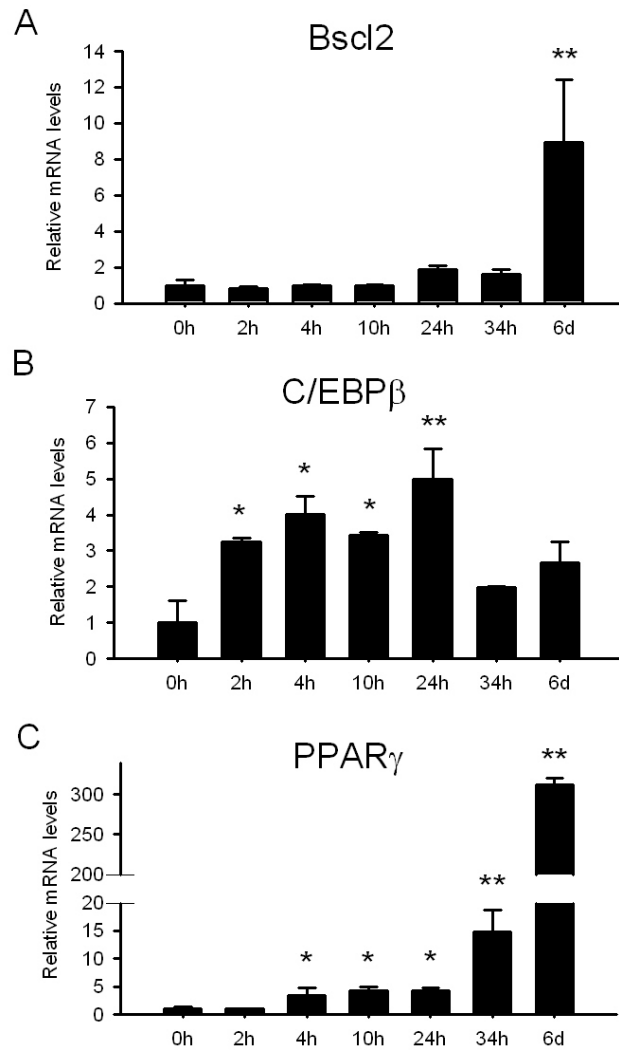

**Fig. S1.** Bcl2 is not induced during the early time of adipogenesis in 3T3-L1 cells.

Expression of Bcl2 (A) and adipogenic transcription factors C/EBP $\beta$  (B) and PPAR $\gamma$  (C) by real-time RT-PCR quantitation during the first 34 h and after 6 days of adipogenesis of 3T3-L1 preadipocytes in vitro. Expression values are normalized to cyclophilin A and displayed as fold difference from time 0 h. Data are means  $\pm$  SD n=3, \* < 0.05; \*\*<0.005 vs control cells at D0.

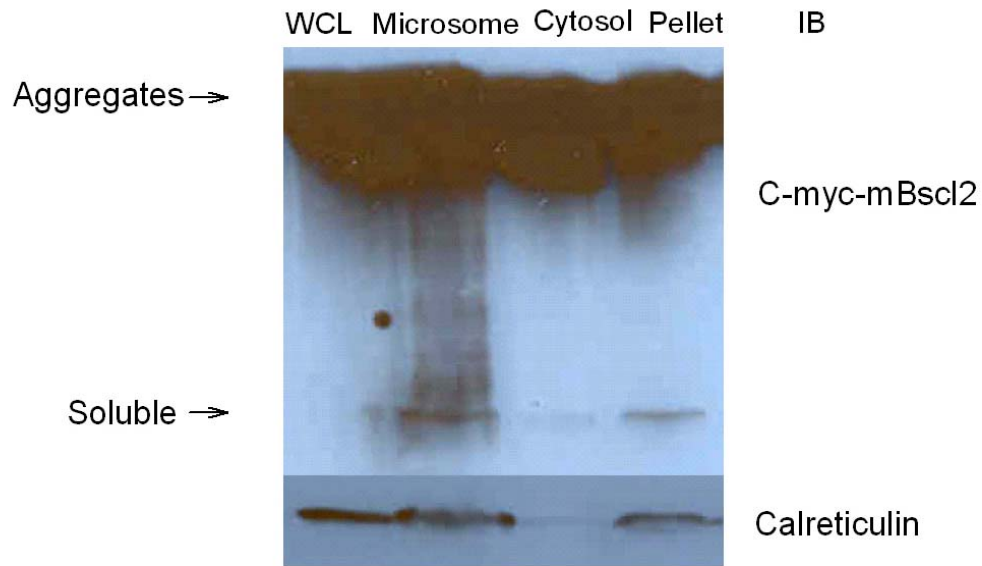

**Fig. S2.** Subcellular distribution of N-terminal c-Myc tagged murine Bsc12 in mature adipocytes. We infected 3T3-L1 preadipocytes with retrovirus overexpressing N-terminal c-Myc tagged Bsc12 and induced the cells to differentiate by DMI. D9 adipocytes were then fractionated, and proteins were analyzed by western blot with anti-c-Myc antibody and anti-calreticulin antibody (see Supplemental methods). WCL: whole cell lysate; pellet: unlysed cells and nucleus from 1,500 g.

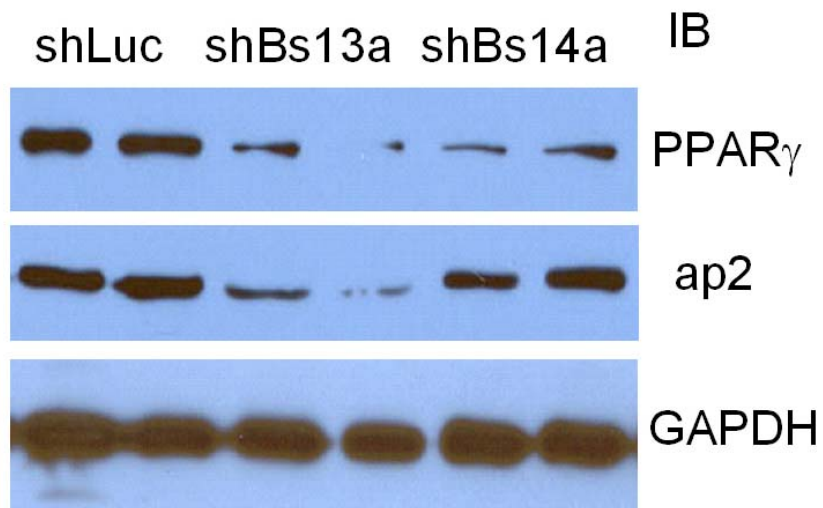

**Fig. S3.** Decreased PPAR $\gamma$  and ap2 protein levels in Bcl2 knockdown cells. 3T3-L1 cells expressing shLuc, shBs13a or shBs14a were differentiated by DMI. At D8, whole cell lysates were harvested and western blot analysis was performed using the same amount of protein. GAPDH levels were used as loading control.

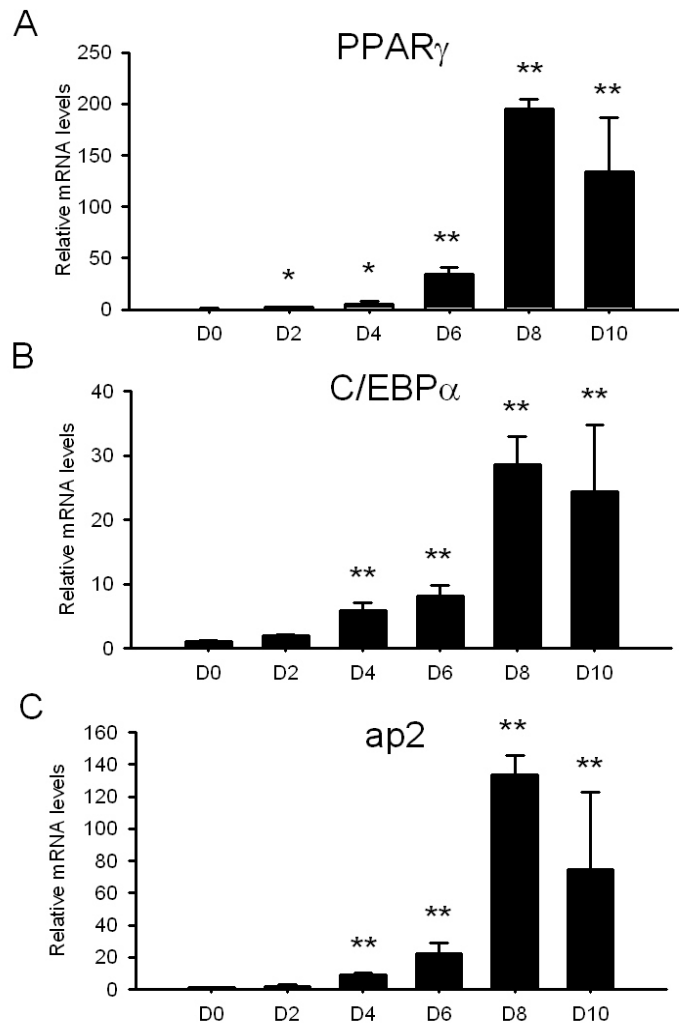

**Fig. S4.** Time course of the mRNA expression level of two major transcription factors PPAR $\gamma$  (A) and C/EBP $\alpha$  (B), and mature adipocyte marker ap2 (C) during differentiation in 3T3-L1 cells induced by the addition of only 1  $\mu$ M pioglitazone. Expression values are normalized to cyclophilin A and displayed as fold difference from D0. Data are means  $\pm$  SD n=3, \* < 0.05; \*\*<0.005 vs control cells at D0.
